# Supplementary material for: Enzymatic cascade of DERA and ADH for lactone synthesis
Source: Royal Society of Chemistry journal article supplement (doi:10.1039/d4cy00047a), 2024-01-01
Supplement: d4cy00047a1.pdf [file d4cy00047a1.pdf]

## Enzymatic cascade of DERA and ADH for lactone synthesis

Eman Abdelraheem,+ Robin Kuijpers,+ Peter-Leon Hagedoom, Frank Hollmann and Ulf Hanefeld\*

Biocatalysis, Department of Biotechnology, Delft University of Technology, Van der Maasweg 9, 2629 HZ Delft, The Netherlands

+both authors have contributed equally

\*Correspondence: [u.hanefeld@tudelft.nl](mailto:u.hanefeld@tudelft.nl) (U.H.)

### Table of Contents

|                                                                                   |    |
|-----------------------------------------------------------------------------------|----|
| Table S1. Primers used in this work .....                                         | 2  |
| Table S2. Nucleotide and amino acid sequence of LbDERA, and LbDERA variants. .... | 2  |
| Table S3. Purification table <i>LbDERA</i> C42M E78K.....                         | 4  |
| Table S4. Screening conversion of lactol to lactone .....                         | 4  |
| Table S5 Conversion lactol to lactone ADH380, ADH440.....                         | 4  |
| Table S6. Cost analysis.....                                                      | 5  |
| Figure S1. SDS PAGE <i>LbDERA</i> C42ME78K .....                                  | 6  |
| Figure S2. Buffer and pH assay <i>LbDERA</i> . ....                               | 6  |
| Figure S3. Screening ADH. ....                                                    | 7  |
| Figure S4 Temperature profile ADH440. ....                                        | 8  |
| Figure S5. Buffer and pH profile <i>LbDERA</i> C42M E78K and ADH440.....          | 8  |
| Figure S6. FMN and NOX concentration.....                                         | 9  |
| Figure S7. NMR lactol .....                                                       | 10 |
| Figure S8. NMR lactone.....                                                       | 11 |
| Figure S9. GC analysis lactone screening .....                                    | 12 |
| Figure S10. GC analysis lactol and lactone .....                                  | 12 |
| Figure S11. Chiral GC analysis lactone.....                                       | 12 |

Table S1. List of primers

|                           |                                                                 |
|---------------------------|-----------------------------------------------------------------|
| <i>Lb</i> DERA_fwd_E78K   | GCTATGGCGACCGAATCT <b>AAA</b> ATCTTCGAAGCGACCACC                |
| <i>Lb</i> DERA_rev_E78K   | GGTGGTCGCTTCGAAGAT <b>TTT</b> AGATTCCGGTCGCCATAGC               |
| <i>Lb</i> DERA_fwd_C42M   | GCTAAAAAATTCAACACCGCGTCTGTT <b>ATG</b> GTAACTCTTACTGGATCCCGTTC  |
| <i>Lb</i> DERA_rev_C42M   | GAACGGGATCCAGTAAGAGTTAACCAT <b>AAC</b> AGACGCGGTGTTGAATTTTTTAGC |
| <i>Lb</i> DERA_fwd_C42M_2 | CAACACCGCGTCTGTT <b>ATG</b> GTAACTCTTACTGGATCC                  |
| <i>Lb</i> DERA_rev_C42M_2 | GGATCCAGTAAGAGTTAAC <b>CAT</b> AACAGACGCGGTGTTG                 |

Table S2. Nucleotide and amino acid sequence of *Lb*DERA, and *Lb*DERA variants.

Histag is underlined and mutations are highlighted in red.

> *Ib*-dera (pET28a, NcoI/XhoI restriction sites) – 5'-5' frame 3 – C-term histag is vector encoded

CCATGGgtACCCTGACCACCGAACAGCTGGCTAAATACATCGACCACACCAACCTGAAAGCTGATGCA  
 ACCGAAGCTGACATCAAACAGACCTGTGATGAAGCTAAAAAATTCAACACCGCGTCTGTT**TGT**GTTAA  
 CTCTTACTGGATCCCGTTCGTTACCGAACAGCTGAAAGGTACCGACGTTAACCCGATCGCGGTTGTTG  
 GTTTCCCGCTGGGTGCTATGGCGACCGAATCT**GAA**ATCTTCGAAGCGACCACCGCGATCGATCAGGGT  
 GCTGAAGAAATCGATATGGTTCTGAACGTTGGTGAAGTAAAGGTGGTAACGATGAAAAAGTTCTGGC  
 TGATATCCAGGGTCTGGCTGACGCGGTTACAGCTAAAGGTAAAATCCTGAAAGTTATCCTGGAAAACG  
 CGCTGCTGACCAAAGACGAAATCGTTCGTGCGTGCCAGCTGTCTGAAAAGCGGGTCTGACTTCGTT  
 AAAACCTCTACCGGTTTCTCTACCTCTGGTGCTAAAGTTGAAGATGTTAAACTGATGCGTGAAACCGT  
 TGGTGACCGTCTGGGTGTTAAAGCGTCTGGTGGTATCCACTCTCGTGAAGAAGCTCTGGCTATGATCG  
 ACGCGGGTGCCTCTCGTATGGGTGTTTCTGCGACCGTTGCGATCCTGACCGGTGATGACTCTCACGCT  
 AAAGCTGGTTACCTCGAG

Translated protein sequence

MGTLTTEQLAKYIDHTNLKADATEADIKQTCDEAKKFNTASV**C**VNSYWIPIFVTEQLKGTDVNPIAVVG  
 FPLGAMATESEIFEATTAIDQGAEEIDMVLNVGELKGGNDEKVLADIQGLADAVHAKGKILKVILENA  
 LLTKDEIVRACQLSEKAGADFKTSTGFSTSGAKVEDVKLMRETVGDRLGVKASGGIHSREEALAMID  
 AGASRMGVSATVAILTGDSSHAKAGYLEHHHHHH

> *Ib*-dera C42M

CCATGGgtACCCTGACCACCGAACAGCTGGCTAAATACATCGACCACACCAACCTGAAAGCTGATGCA  
 ACCGAAGCTGACATCAAACAGACCTGTGATGAAGCTAAAAAATTCAACACCGCGTCTGTT**ATG**GTTAA  
 CTCTTACTGGATCCCGTTCGTTACCGAACAGCTGAAAGGTACCGACGTTAACCCGATCGCGGTTGTTG  
 GTTTCCCGCTGGGTGCTATGGCGACCGAATCT**GAA**ATCTTCGAAGCGACCACCGCGATCGATCAGGGT  
 GCTGAAGAAATCGATATGGTTCTGAACGTTGGTGAAGTAAAGGTGGTAACGATGAAAAAGTTCTGGC  
 TGATATCCAGGGTCTGGCTGACGCGGTTACAGCTAAAGGTAAAATCCTGAAAGTTATCCTGGAAAACG  
 CGCTGCTGACCAAAGACGAAATCGTTCGTGCGTGCCAGCTGTCTGAAAAGCGGGTCTGACTTCGTT  
 AAAACCTCTACCGGTTTCTCTACCTCTGGTGCTAAAGTTGAAGATGTTAAACTGATGCGTGAAACCGT  
 TGGTGACCGTCTGGGTGTTAAAGCGTCTGGTGGTATCCACTCTCGTGAAGAAGCTCTGGCTATGATCG

ACGCGGGTGCCTCTCGTATGGGTGTTTCTGCGACCGTTGCGATCCTGACCGGTGATGACTCTCACGCT  
AAAGCTGGTTACCTCGAG

#### Translated protein sequence

MGTLTTEQLAKYIDHTNLKADATEADIKQTCDEAKKFNTASV**M**VNSYWI PFVTEQLKGT DVNPIAVVG  
FPLGAMATES**E**IFEATTAIDQGAEEIDMVLNVGELKGGNDEKVLADIQGLADAVHAKGKILKVILENA  
LLTKDEIVRACQLSEKAGAD FVKTSTGFSTSGAKVEDVKLMRET VGDRLGVKASGGIHSREEALAMID  
AGASRMGVSATVA I LTGDDSHAKAGYLEHHHHHH

#### > Ib-dera E78K

CCATGGgtACCCTGACCACCGAACAGCTGGCTAAATACATCGACCACACCAACCTGAAAGCTGATGCA  
ACCGAAGCTGACATCAAACAGACCTGTGATGAAGCTAAAAAATTC AACACCGCGTCTGTT**TGT**GTTAA  
CTCTTACTGGATCCCGTTCGTTACCGAACAGCTGAAAGGTACCGACGTTAACCCGATCGCGGTTGTTG  
GTTTCCCGCTGGGTGCTATGGCGACCGAATCT**AAA**ATCTTCGAAGCGACCACCGCGATCGATCAGGGT  
GCTGAAGAAATCGATATGGTTCTGAACGTTGGTGA ACTGAAAGGTGGTAACGATGAAAAAGTTCTGGC  
TGATATCCAGGGTCTGGCTGACGCGGTTACGCTAAAGGTAAAATCCTGAAAGTTATCCTGGAAAACG  
CGCTGCTGACCAAAGACGAAATCGTTCGTGCGTGCCAGCTGTCTGAAAAAGCGGGTGTGACTTCGTT  
AAAACCTCTACCGGTTTCTCTACCTCTGGTGCTAAAGTTGAAGATGTTAAACTGATGCGTGAAACCGT  
TGGTGACCGTCTGGGTGTTAAAGCGTCTGGTGGTATCCACTCTCGTGAAGAAGCTCTGGCTATGATCG  
ACGCGGGTGCCTCTCGTATGGGTGTTTCTGCGACCGTTGCGATCCTGACCGGTGATGACTCTCACGCT  
AAAGCTGGTTACCTCGAG

#### Translated protein sequence

MGTLTTEQLAKYIDHTNLKADATEADIKQTCDEAKKFNTASV**C**VNSYWI PFVTEQLKGT DVNPIAVVG  
FPLGAMATES**K**IFEATTAIDQGAEEIDMVLNVGELKGGNDEKVLADIQGLADAVHAKGKILKVILENA  
LLTKDEIVRACQLSEKAGAD FVKTSTGFSTSGAKVEDVKLMRET VGDRLGVKASGGIHSREEALAMID  
AGASRMGVSATVA I LTGDDSHAKAGYLEHHHHHH

#### > Ib-dera C42M E78K

CCATGGgtACCCTGACCACCGAACAGCTGGCTAAATACATCGACCACACCAACCTGAAAGCTGATGCA  
ACCGAAGCTGACATCAAACAGACCTGTGATGAAGCTAAAAAATTC AACACCGCGTCTGTT**ATG**GTTAA  
CTCTTACTGGATCCCGTTCGTTACCGAACAGCTGAAAGGTACCGACGTTAACCCGATCGCGGTTGTTG  
GTTTCCCGCTGGGTGCTATGGCGACCGAATCT**AAA**ATCTTCGAAGCGACCACCGCGATCGATCAGGGT  
GCTGAAGAAATCGATATGGTTCTGAACGTTGGTGA ACTGAAAGGTGGTAACGATGAAAAAGTTCTGGC  
TGATATCCAGGGTCTGGCTGACGCGGTTACGCTAAAGGTAAAATCCTGAAAGTTATCCTGGAAAACG  
CGCTGCTGACCAAAGACGAAATCGTTCGTGCGTGCCAGCTGTCTGAAAAAGCGGGTGTGACTTCGTT  
AAAACCTCTACCGGTTTCTCTACCTCTGGTGCTAAAGTTGAAGATGTTAAACTGATGCGTGAAACCGT  
TGGTGACCGTCTGGGTGTTAAAGCGTCTGGTGGTATCCACTCTCGTGAAGAAGCTCTGGCTATGATCG  
ACGCGGGTGCCTCTCGTATGGGTGTTTCTGCGACCGTTGCGATCCTGACCGGTGATGACTCTCACGCT  
AAAGCTGGTTACCTCGAG

#### Translated protein sequence

MGTLTTEQLAKYIDHTNLKADATEADIKQTCDEAKKFNTASV**M**VNSYWI PFVTEQLKGT DVNPIAVVG  
FPLGAMATES**K**IFEATTAIDQGAEEIDMVLNVGELKGGNDEKVLADIQGLADAVHAKGKILKVILENA  
LLTKDEIVRACQLSEKAGAD FVKTSTGFSTSGAKVEDVKLMRET VGDRLGVKASGGIHSREEALAMID  
AGASRMGVSATVA I LTGDDSHAKAGYLEHHHHHH

Table S3. Purification table *LbDERA* C42M E78K

| Sample | [protein]<br>(mg/mL) | Activity<br>(U/mL) | Volume<br>(mL) | Specific<br>Activity<br>(U/mg) | Units<br>Enzyme | mg<br>Protein | Purification<br>Factor | Recovery<br>(%) |
|--------|----------------------|--------------------|----------------|--------------------------------|-----------------|---------------|------------------------|-----------------|
| CFE    | 5.15                 | 2.45               | 75.00          | 0.48                           | 183.81          | 386.36        | 1                      | 100.00          |
| FT     | 2.04                 | 1.09               | 70.00          | 0.53                           | 76.34           | 143.11        | 1.12                   | 41.53           |
| 8%B    | 5.14                 | 3.46               | 2.50           | 0.67                           | 8.66            | 12.88         | 1.41                   | 4.71            |
| 20%B   | 7.16                 | 4.92               | 2.50           | 0.69                           | 12.30           | 17.90         | 1.44                   | 6.69            |
| 100%B  | 7.34                 | 5.02               | 2.50           | 0.68                           | 12.56           | 18.34         | 1.44                   | 6.83            |

Purification table of *LbDERA* C42M E78K. Enzyme concentrations were measured with BCA assay. Activity of DERA was measured with coupled DR5P assay. CFE is cell free extract, FT is flow through fraction. Buffer A: 20 mM KPi, 100 mM NaCl, pH 7.4. Buffer B: 20 mM KPi, 500 mM imidazole, 100 mM NaCl, pH 7.4.

Table S4. Screening conversion of lactol to lactone

| ADH | Yield Lactone (%)<br>with NAD <sup>+</sup> | Yield Lactone (%)<br>with NADP <sup>+</sup> |
|-----|--------------------------------------------|---------------------------------------------|
| 210 | 0                                          | 8                                           |
| 260 | -                                          | 33                                          |
| 440 | -                                          | 45                                          |
| 441 | 19                                         | 12                                          |
| 442 | 22                                         | -                                           |
| 380 | 51                                         | -                                           |
| RAS | 0                                          | 0                                           |
| LB  | 0                                          | 0                                           |
| LK  | 0                                          | 0                                           |

Screening of most active ADH for the conversion of lactol to lactone. 20 mM lactol, 5 mM NAD(P)<sup>+</sup>, 1 mg ADH, and 1 mg NOX were mixed in 0.2 mL 50 mM KPi pH 7.5 buffer. The reactions were incubated at 30 °C for 20 hours and analysed with GC.

Table S5 Conversion lactol to lactone ADH380, ADH440

| ADH | Specific activity<br>(U/mg) | Yield Lactone (%)<br>with 1 unit ADH |
|-----|-----------------------------|--------------------------------------|
| 380 | 204                         | 10                                   |
| 440 | 1.2                         | 46                                   |

Screening of most active ADH for the conversion of lactol to lactone. 20 mM lactol, 5 mM NAD(P)<sup>+</sup>, 1 unit ADH, and 1 mg NOX were mixed in 0.2 mL 50 mM KPi pH 7.5 buffer. The reactions were incubated at 30 °C for 20 hours and analysed with GC.

Table S6. Cost analysis of the cofactor regeneration system

The cost for the regeneration systems within the reaction has been calculated. It is important to note that this cost reflects our expenses for the reaction and serves as an indication for the cost on laboratory scale. The calculations were based on the prices provided by the suppliers: FMN<sup>1</sup> and catalase<sup>2</sup> were purchased from Sigma Merck and NOX<sup>3</sup> from Prozomix.

|          | Amount<br>supplier (mg) | Price<br>supplier (€) | Amount reaction<br>(mg/mL) | Price reaction<br>(€/mL) |
|----------|-------------------------|-----------------------|----------------------------|--------------------------|
| NOX      | 1000                    | 495.0                 | 5                          | 2.5                      |
| FMN      | 100                     | 211                   | 0.46                       | 0.97                     |
| catalase | 1000                    | 54.90                 | 0.0015                     | 80 10 <sup>-6</sup>      |

<sup>1</sup> Sigma Merck, „Riboflavin 5'-monophosphate sodium salt hydrate," Sigma Aldrich Merck, 2023. [Online]. Available: <https://www.sigmaaldrich.com/NL/en/product/sigma/f2253>. [11 08 2023].

<sup>2</sup> Sigma Merck, „Catalase from bovine liver," Sigma Merck, [Online]. Available: [https://www.sigmaaldrich.com/NL/en/product/sigma/c1345?gclid=CjwKCAiA1MCRBhAoEiwAC2d64RDCfajphL4AfeN1nXclU7\\_-AY0sY1MsE9se24nAb2bn9L5sU5Lf4BoCl5gQAvD\\_BwE](https://www.sigmaaldrich.com/NL/en/product/sigma/c1345?gclid=CjwKCAiA1MCRBhAoEiwAC2d64RDCfajphL4AfeN1nXclU7_-AY0sY1MsE9se24nAb2bn9L5sU5Lf4BoCl5gQAvD_BwE). [06 12 2023].

<sup>3</sup> Prozomix, „NAD(P)H Oxidase," Prozomix, 2023. [Online]. Available: <http://www.prozomix.com/products/view?product=1892>. [11 08 2023].

Figure S1. SDS PAGE *Lb*DERA C42M E78K

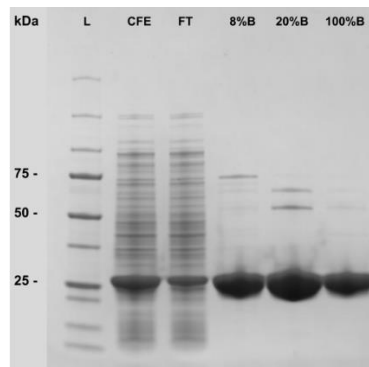

L: ladder, CFE: cell free extract, FT: flow through, 8%B: elution at 8% elution buffer, 20%B: elution at 20% elution buffer. 100%B: elution at 100% elution buffer. MW DERA: 25 kDa.

Figure S2. Buffer and pH profile of *Lb*DERA.

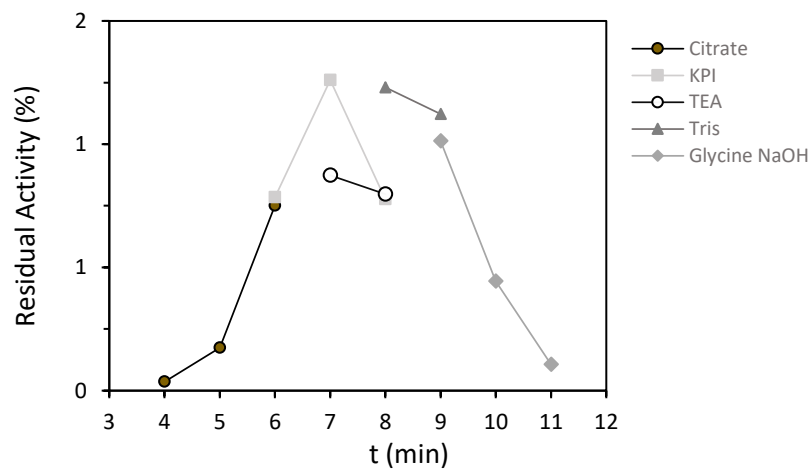

Overview of specific activity of *Lb*DERA at different pH values. The enzyme assay was performed using the standard assay procedure in the following buffers (100 mM): (1) citrate (pH 4.2, 5.0 and 6.2), (2) potassium phosphate (pH 6.2, 7.0 and 8.2), (3) Triethanolamine (pH 7.0, 8.0 and 8.3) and (4) Gly–NaOH (pH 8.6, 9.0, 10.0 and 10.6).

Figure S3. Screening ADH.

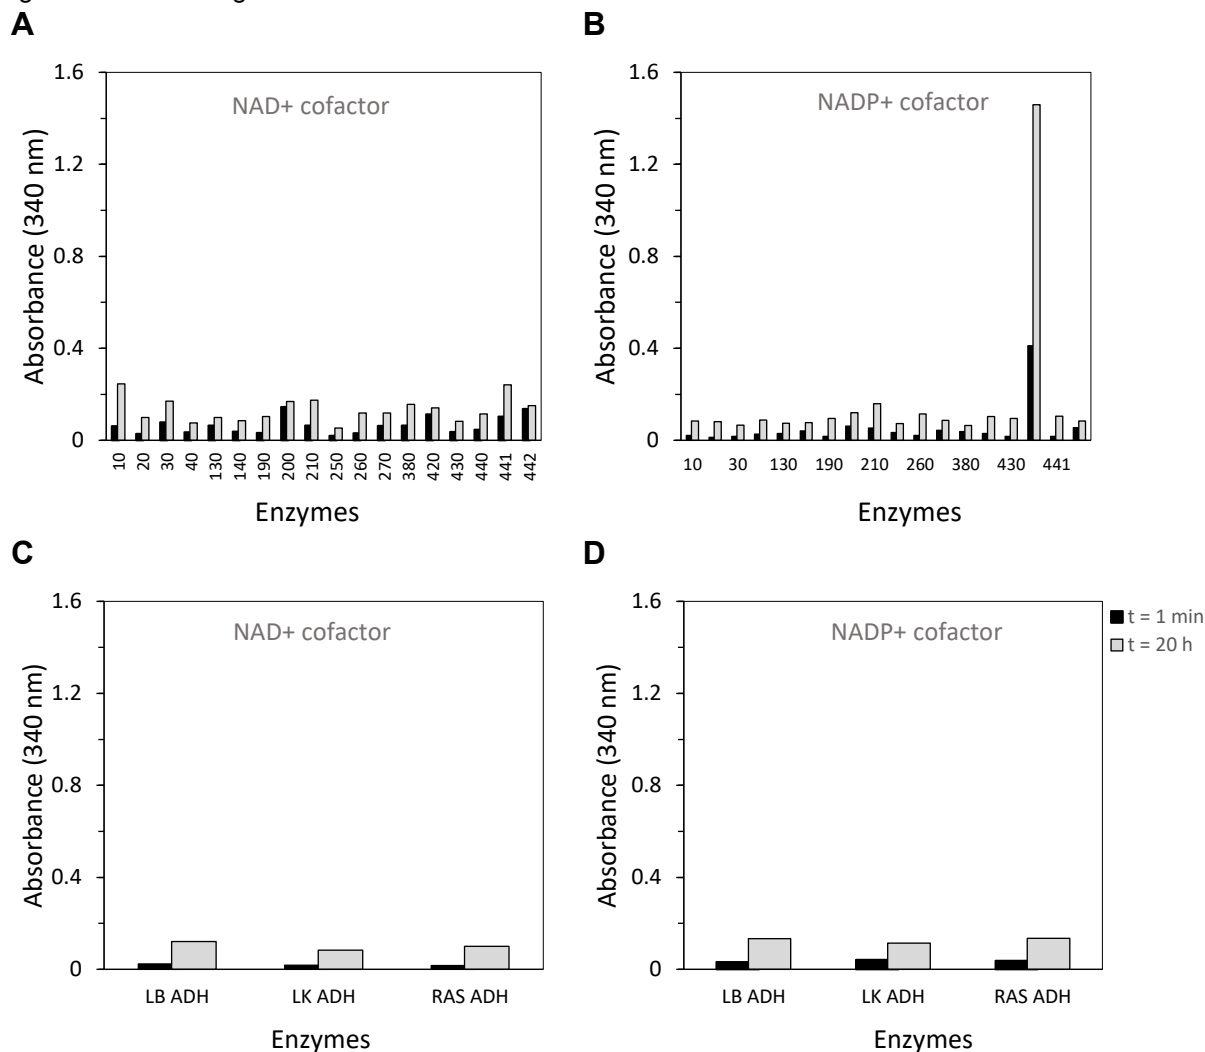

Activity assay for 18 different commercial ADH with NAD<sup>+</sup> (**A**) and NADP<sup>+</sup> (**B**) as cofactor. The reactions were performed in a UV 96-well microplate in 50 mM KPi pH 7 buffer with a total reaction volume of 200  $\mu$ L. The reaction mixture contains 0.5 mg enzyme, 2 mM lactol, 1 mM NAD(P)<sup>+</sup>. The blank measurement was done without enzyme. The absorbance value of the blank was subtracted from the other measurements. The samples were incubated at 30 C for one minute (left) and 20 hours (right) before measuring absorbance at 340 nm. And additional activity assay was performed for three ADH isolated and purified at our lab from the species *Ralstonia* (RAS), *Lactobacillus brevis* (LB), and *Lactobacillus kefir* (LK), again with NAD<sup>+</sup> (**C**) and NADP<sup>+</sup> (**D**) as cofactor.

Figure S4 Temperature profile ADH440.

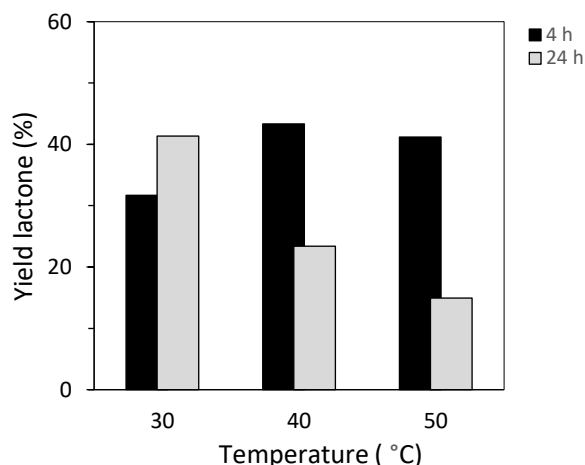

Temperature profile for the conversion of lactol to lactone by ADH440. Experimental conditions: 1 mL final volume in Eppendorf tubes, 800 rpm, 24hr on thermo shaker, substrate 20 mM, NADP<sup>+</sup> 5 mM, 440 ADH 1 mg, NOX 1 mg. Incubated at 30 °C, 40 °C and 50 °C Extraction with 2\* 500 µL EtOAc. Conversions were measured by GC-FID.

Figure S5. Buffer and pH profile *LbDERA* C42M E78K and ADH440.

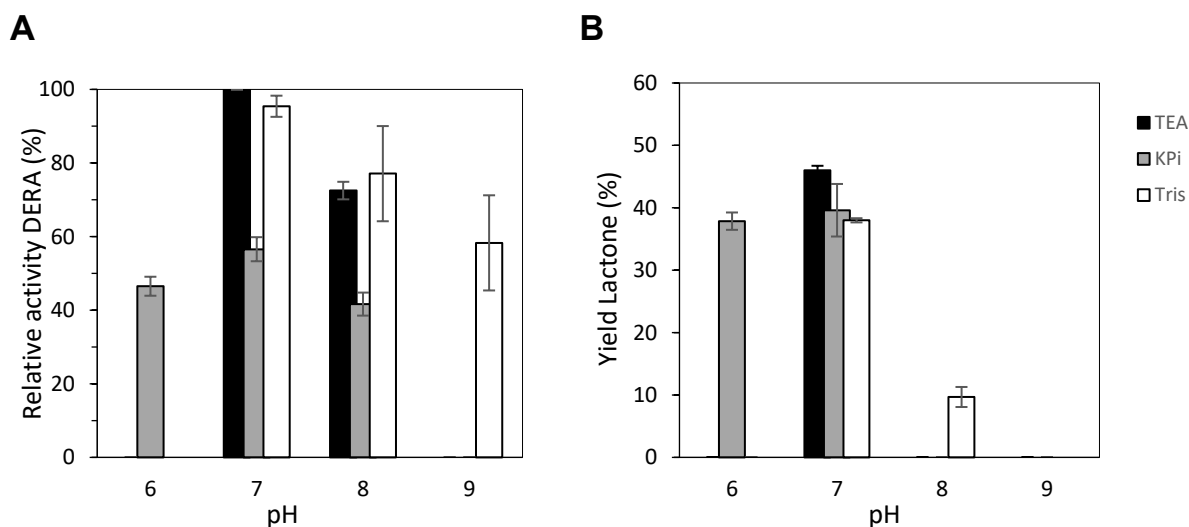

Buffer Assay *LbDERA* C42M E78K and ADH440. 100 mM TEA pH 7/8, 100 mM Tris pH 7/8/9, and 100 mM KPi pH 6/7/8. **A.** Relative activity of DERA in different buffers. 0.4 mM DR5P, 0.2 mM NADH, 4U GDH/TPI, 10 µL DERA (3.8 U/mL) in different buffers. Absorbance at 340 nm detected. Activity measurements were done in duplicates. **B.** Conversion of lactol to lactone by ADH440. 10 mM lactol, 5 mM NADP<sup>+</sup>, 1 mg NOX, 1.2 U ADH440, 0.2 mL 30 °C, 800 rpm, 15h. Reactions were done in duplicates.



Figure S6. FMN and NOX concentration

**A**

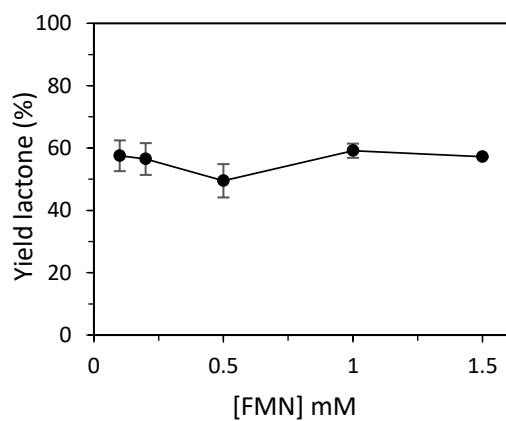

**B**

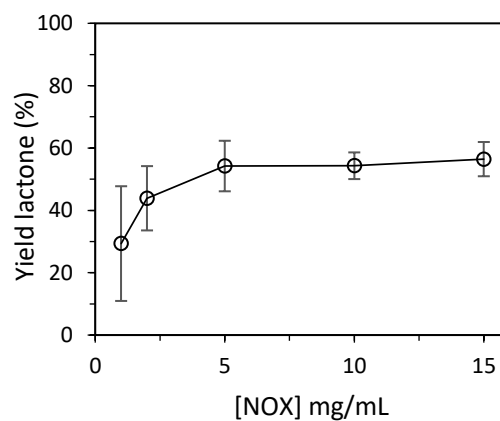

Oxidation of lactol to lactone with ADH440 and regeneration system FMN and NOX for different concentrations of FMN and NOX. **A.** FMN. 27 mM crude lactol, 5 mM NADP<sup>+</sup>, 0.1, 0.2, 0.5, 1, 1.5 mM FMN, 2.5 U ADH440 in 100 mM TEA pH 7.0, 800 rpm, 30 °C. Volume: 0.2 mL in 1,5 mL glass vials. **B.** NOX. 22 mM crude lactol, 5 mM NADP<sup>+</sup>, 1, 2, 5, 10, 15 mg/mL NOX, 2.5 U ADH440 in 100 mM TEA pH 7.0, 800 rpm, 30 °C. Volume: 0.2 mL in 2 mL Eppendorf tubes. Reactions were done in duplicates.

Figure S7. NMR lactol

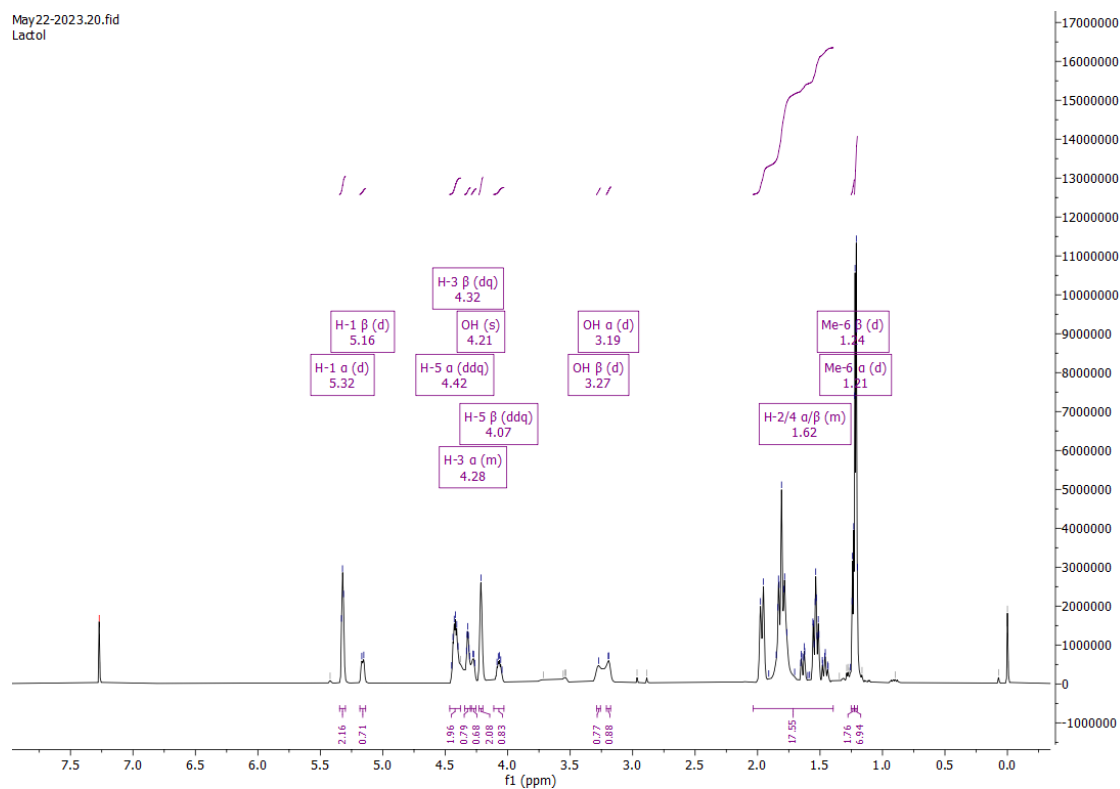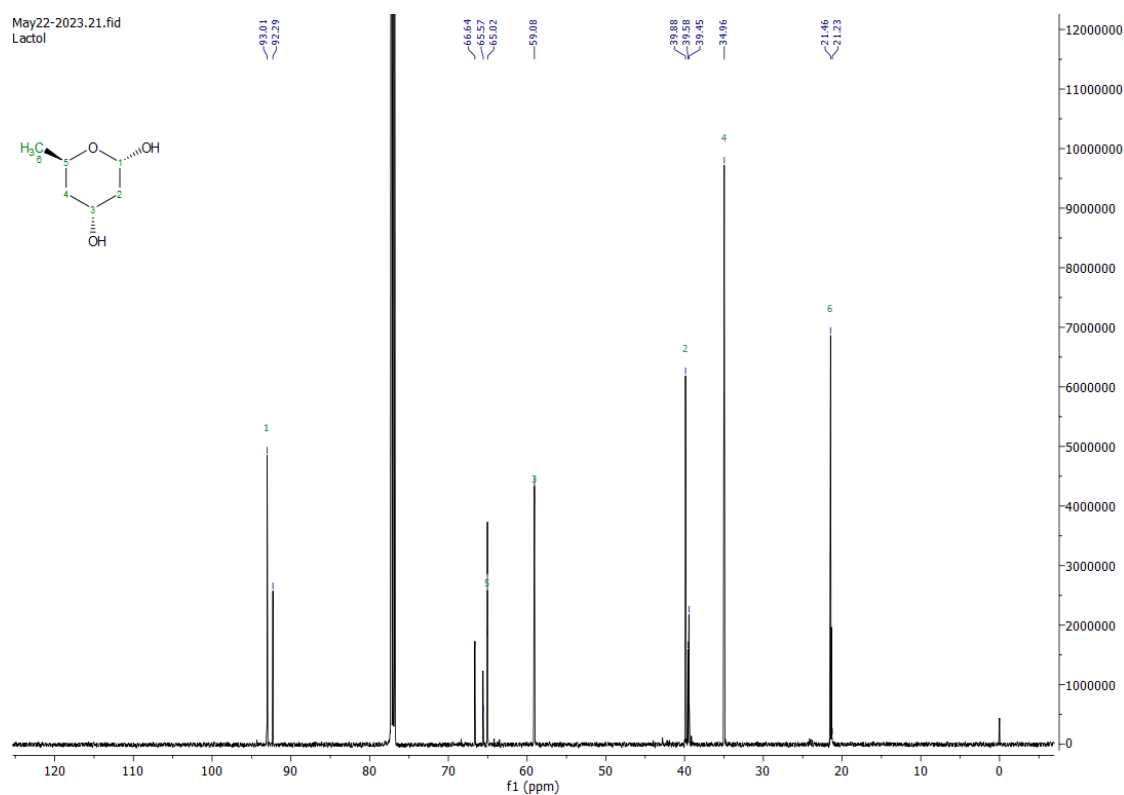

NMR spectra are in accordance with prior study: Gijzen, Harrie JM; Wong, Chi-Huey, "Unprecedented asymmetric aldol reactions with three aldehyde substrates catalyzed by 2-deoxyribose-5-phosphate aldolase," *Journal of the American Chemical Society*, vol. 116, no. 18, pp. 8422-8423, 1994.

Figure S8. NMR lactone

Lactone\_purified\_PROTON\_20230524\_01

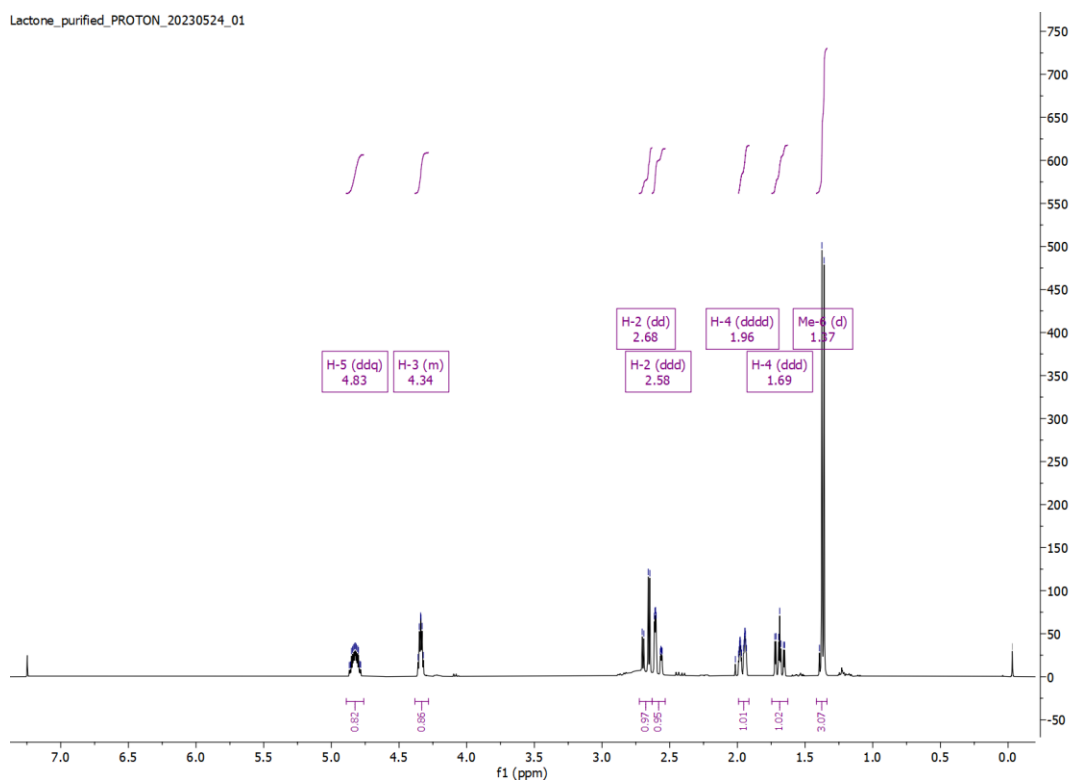

Lactone\_purified\_CARBON\_20230524\_01

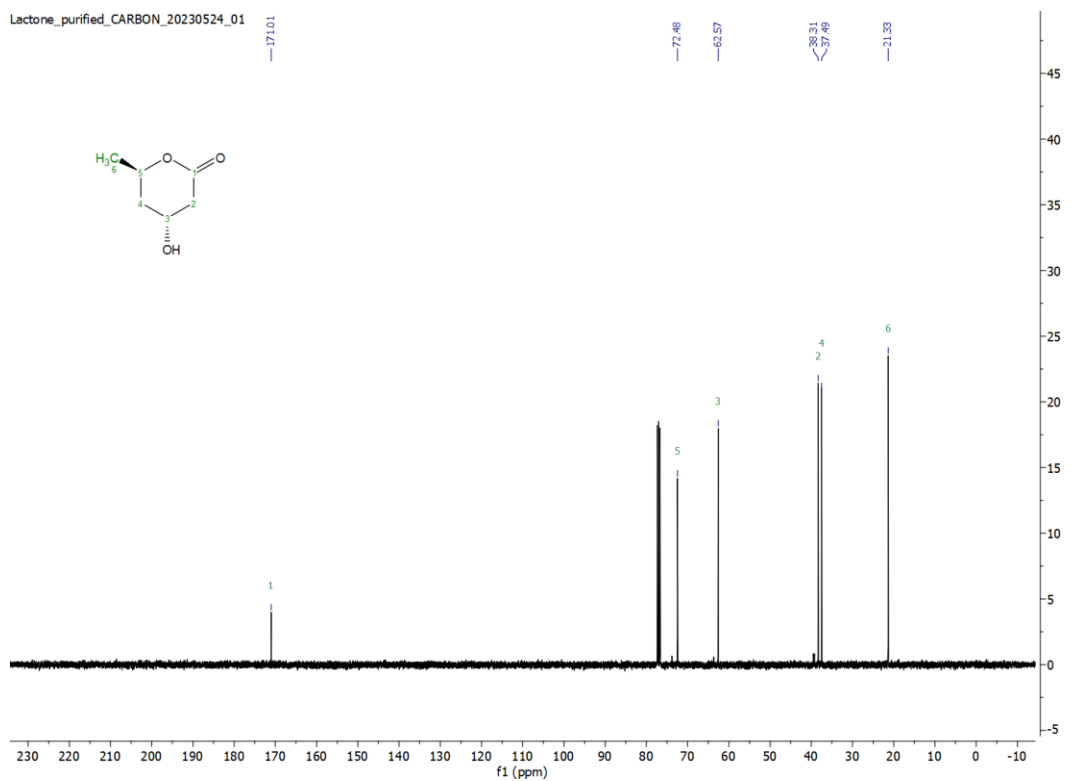

NMR spectra are in accordance with prior study: Gijzen, Harrie JM; Wong, Chi-Huey, "Unprecedented asymmetric aldol reactions with three aldehyde substrates catalyzed by 2-deoxyribose-5-phosphate aldolase," *Journal of the American Chemical Society*, vol. 116, no. 18, pp. 8422-8423, 1994.

Figure S9. GC analysis lactone screening

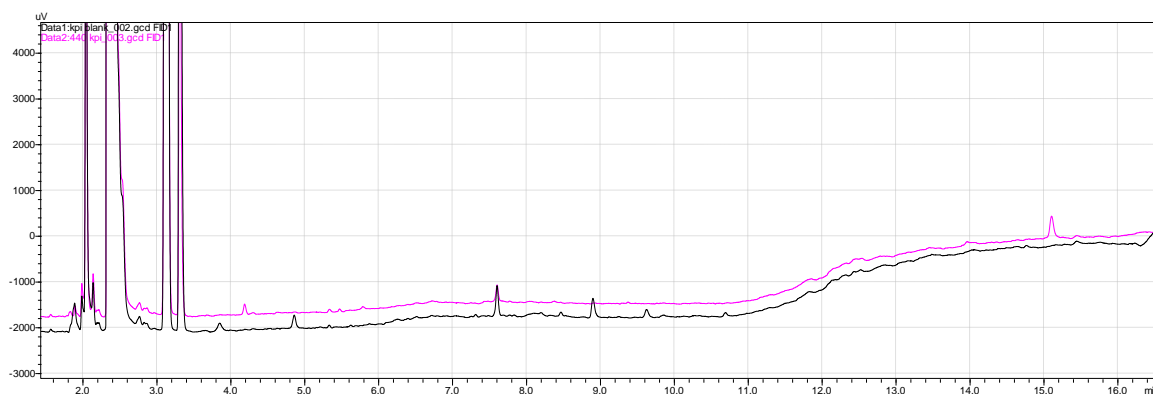

GC analysis for screening ADH. Lactol rt = 8.9 minutes (pink). Lactone rt = 15.1 minutes (black). 5 mM of decane was used as internal standard. 200  $\mu$ L samples were extracted 3x with 1:1 ethyl acetate with 5 mM decane. Extraction was dried over  $MgSO_4$  and subjected to GC.

Figure S10. GC analysis lactol and lactone

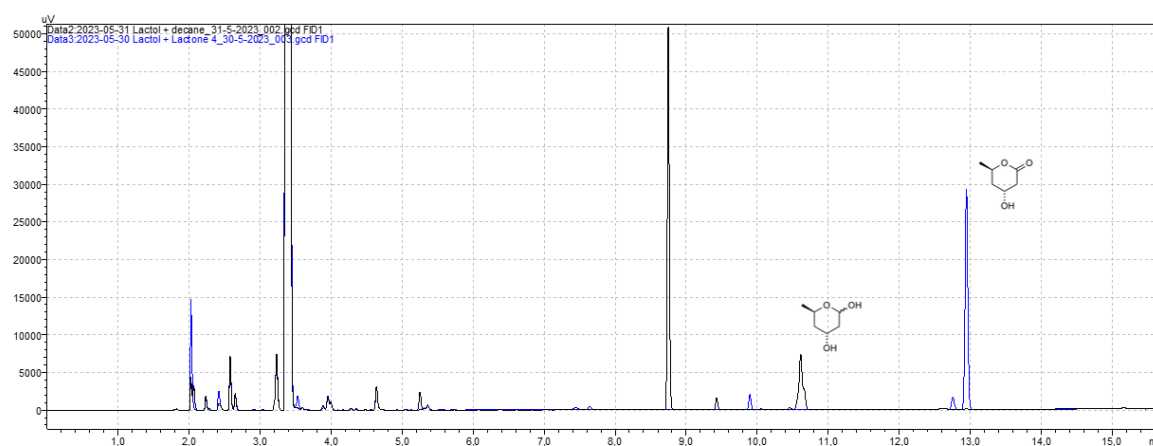

GC analysis of lactol rt = 10.6 minutes (black) and lactone rt = 12.9 minutes (blue). 5 mM of decane is used as internal standard (rt = 8.7 minutes). 200  $\mu$ L samples were extracted 3x with 1:1 ethyl acetate with 5 mM decane. Extraction was dried over  $MgSO_4$  and subjected to GC.

Figure S11. Chiral GC analysis lactone

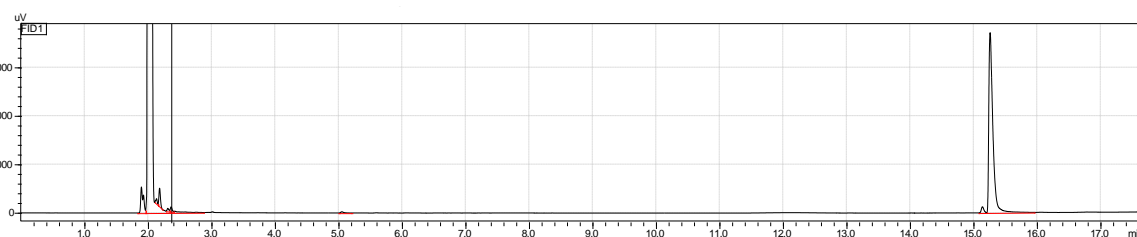

Chiral GC analysis of lactone. 1 mg of pure lactone was dissolved in 1 mL ethyl acetate and subjected to GC.
